# Supplementary material
Source: PubMed Central journal article supplement (PMC6046266)

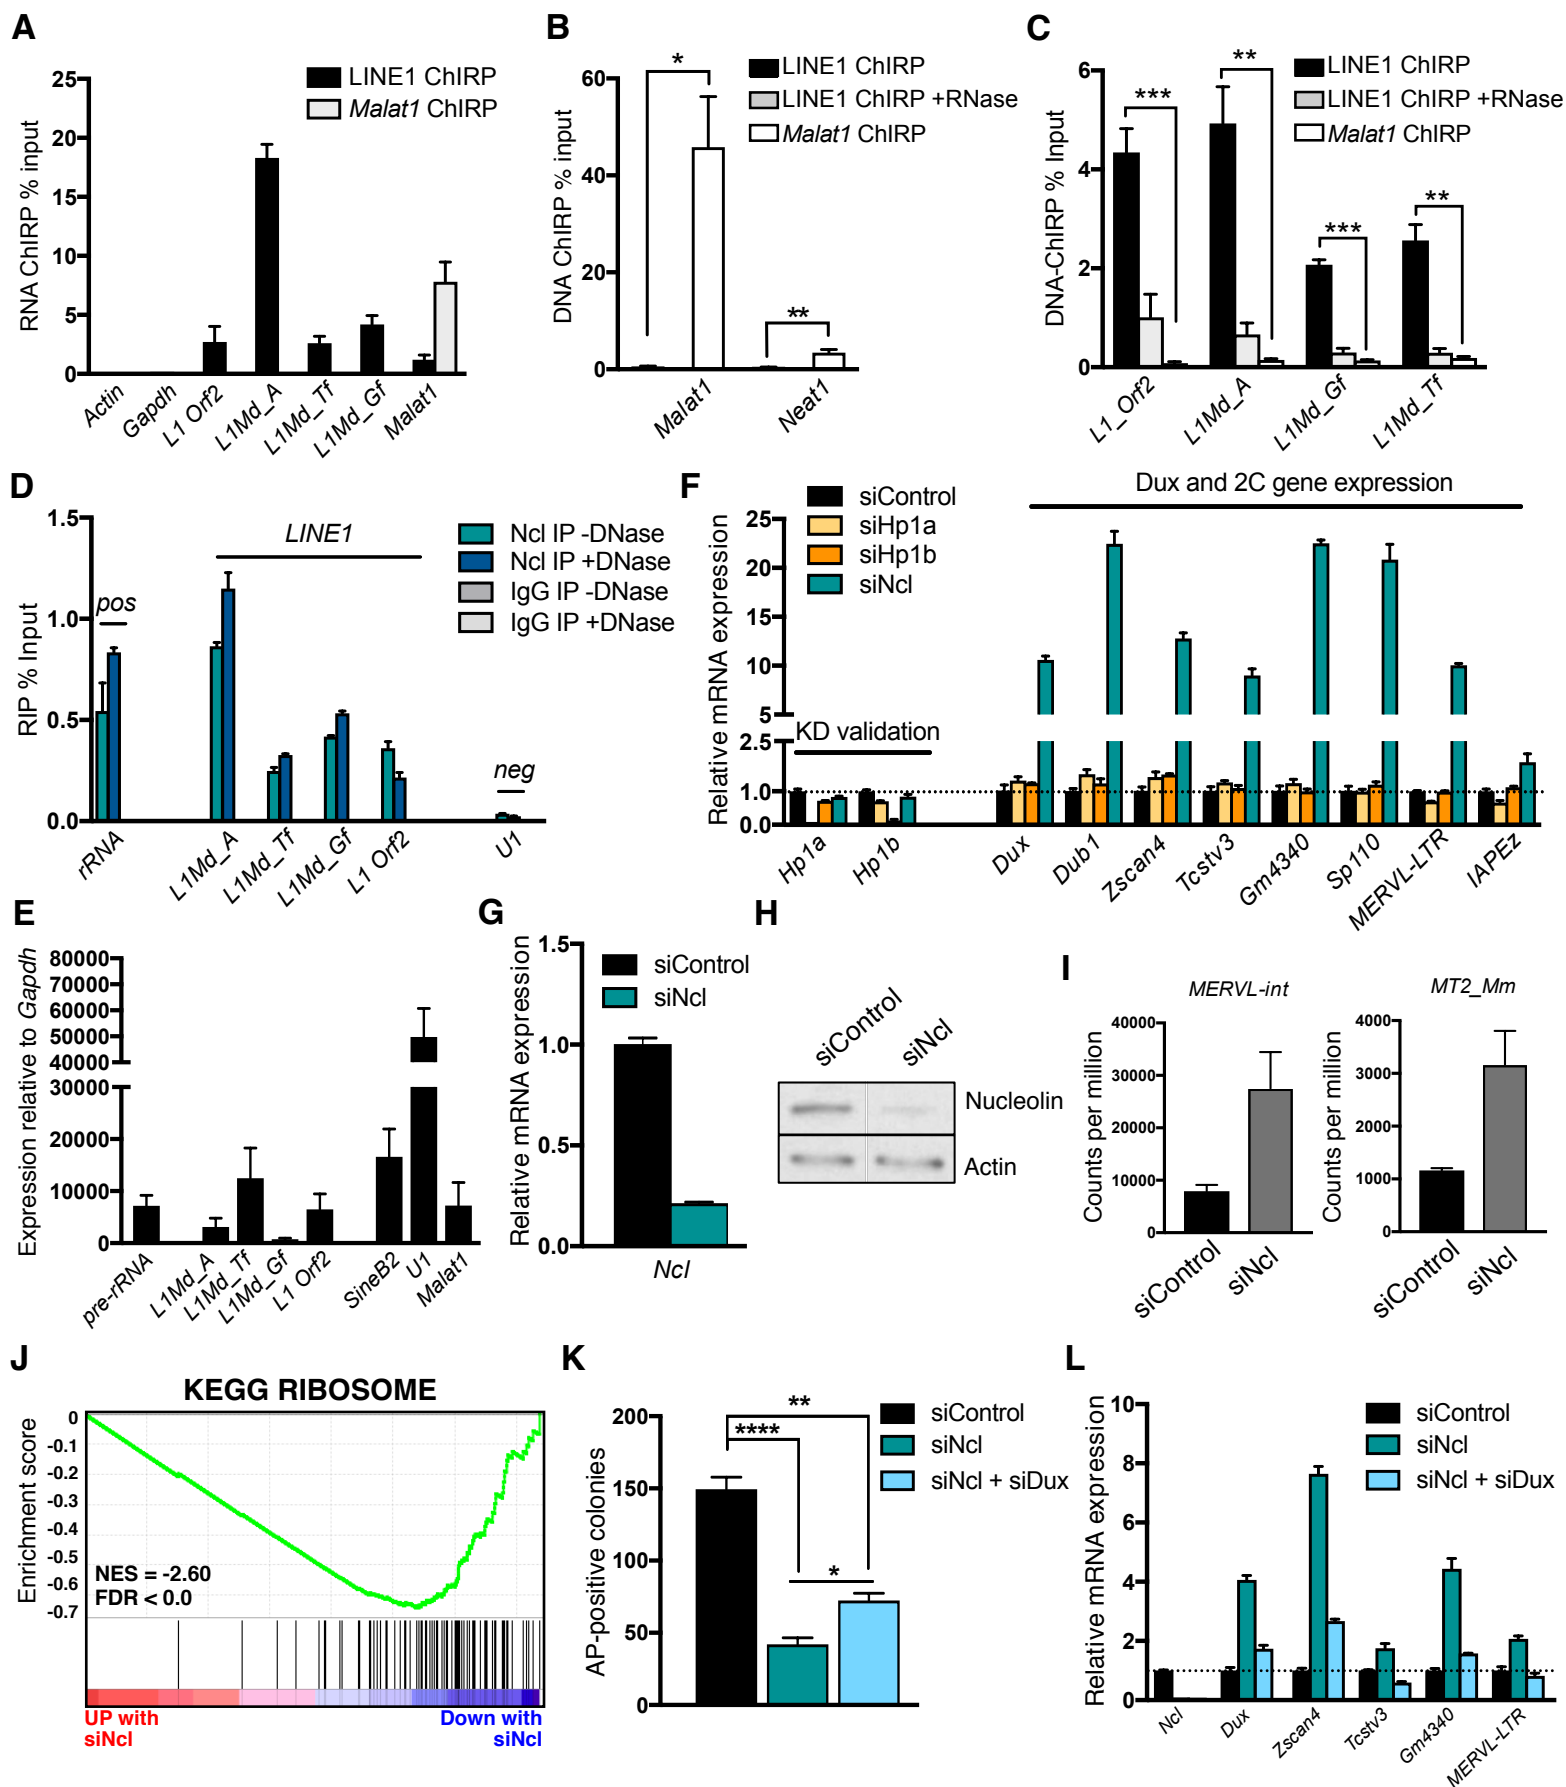

Supplement: NIHMS970221-supplement-10.pdf [file NIHMS970221-supplement-10.pdf]

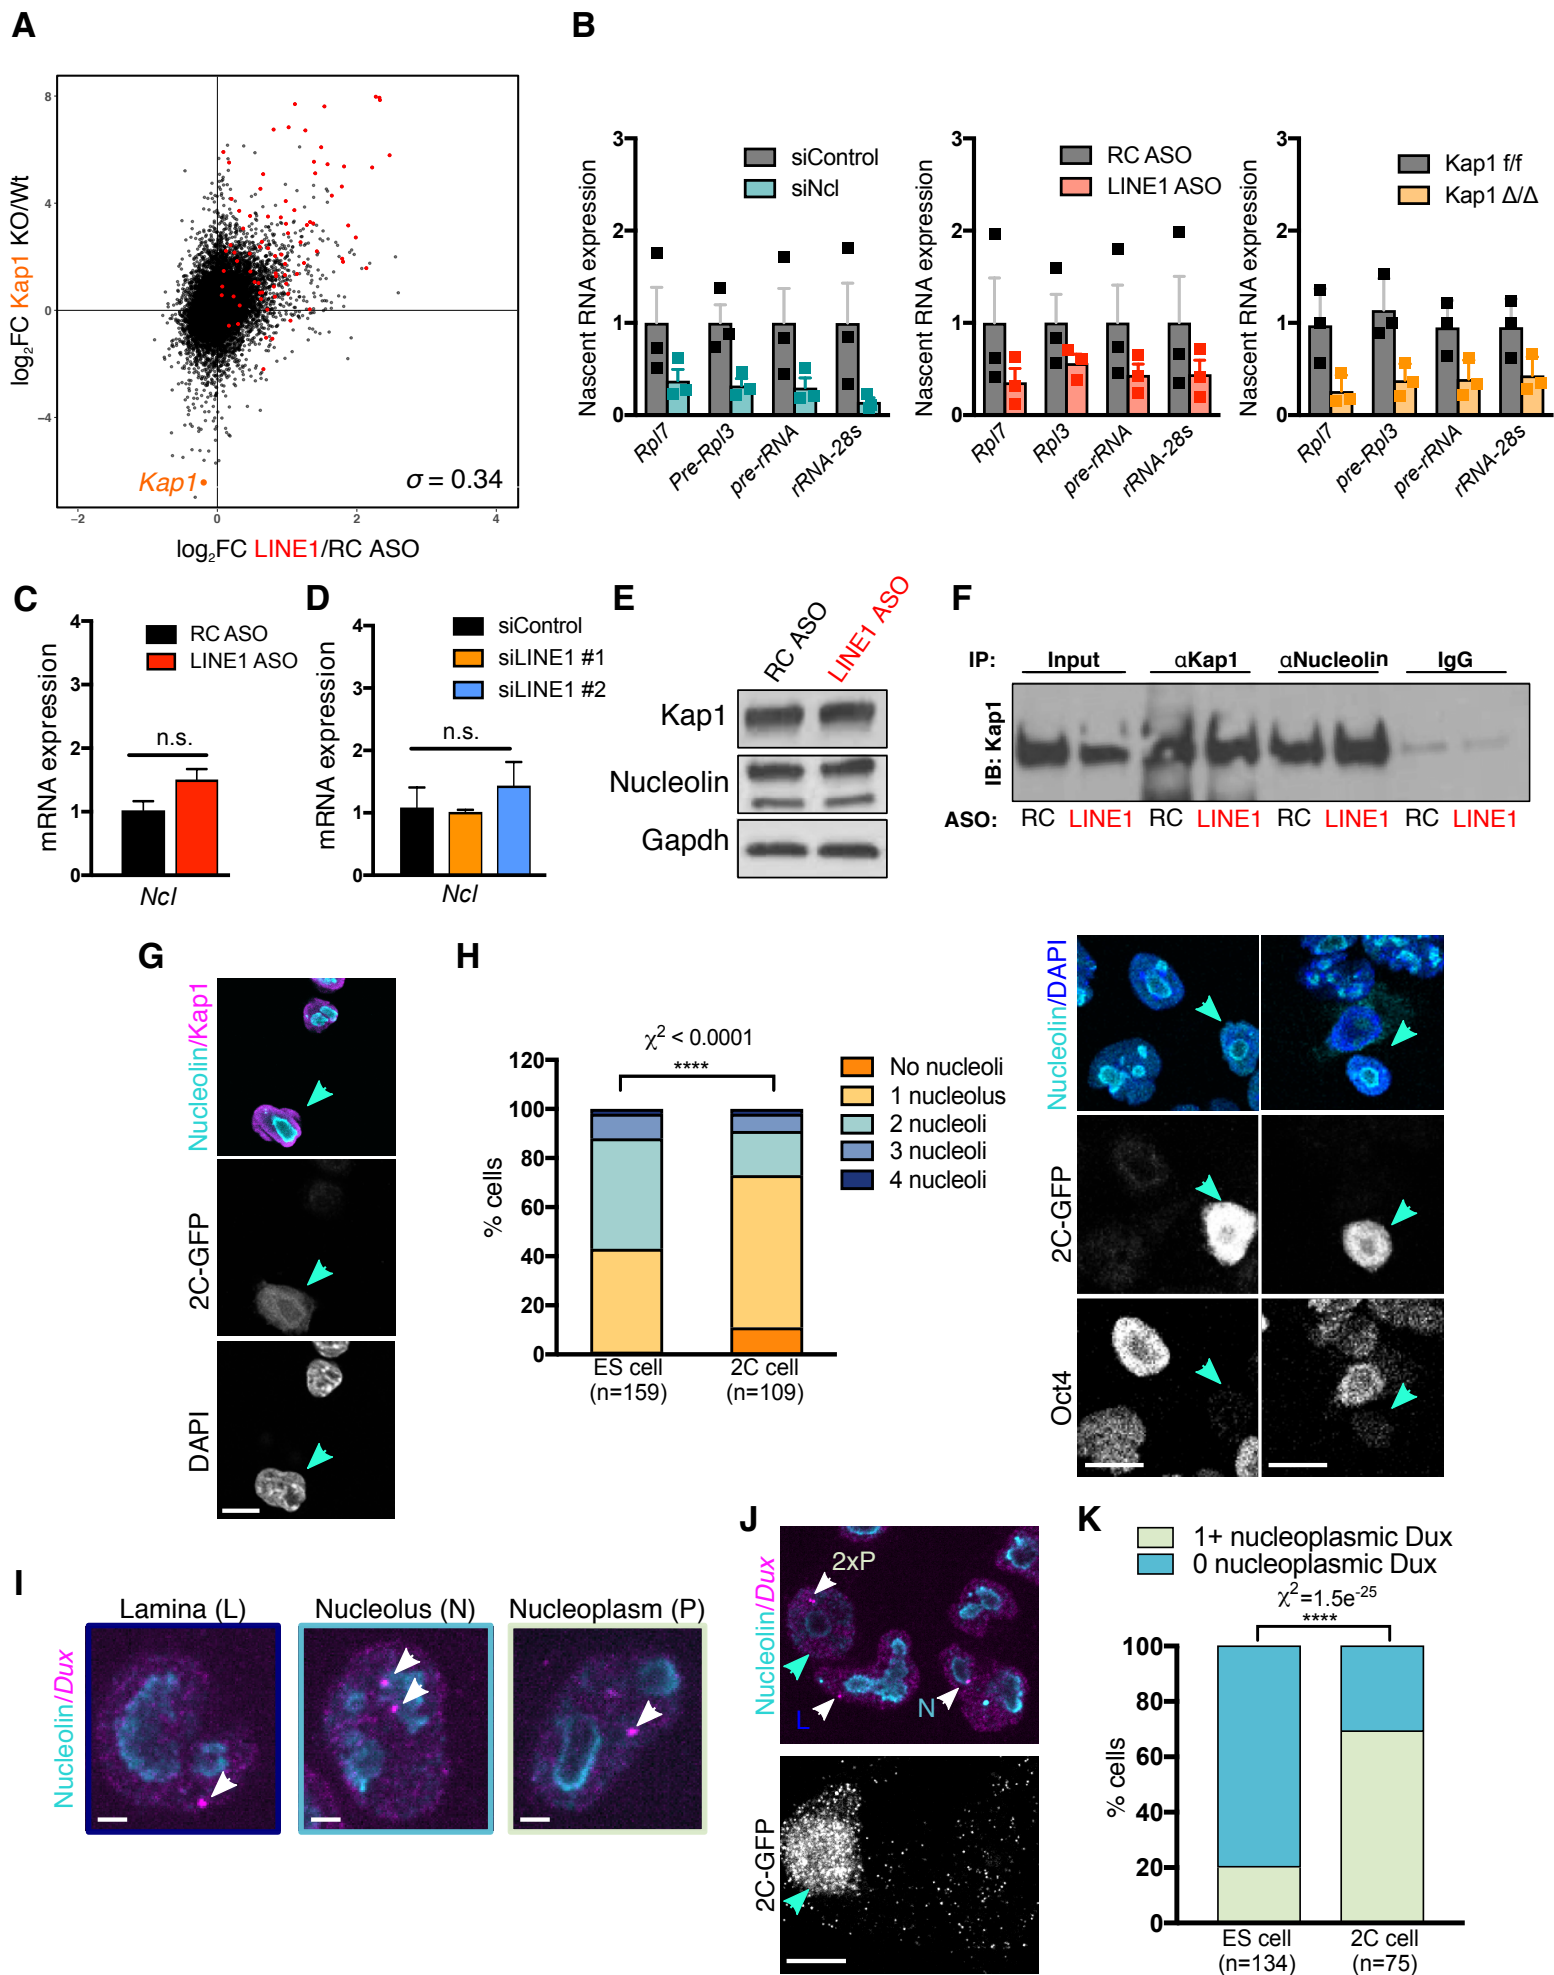

Supplement: NIHMS970221-supplement-11.pdf [file NIHMS970221-supplement-11.pdf]

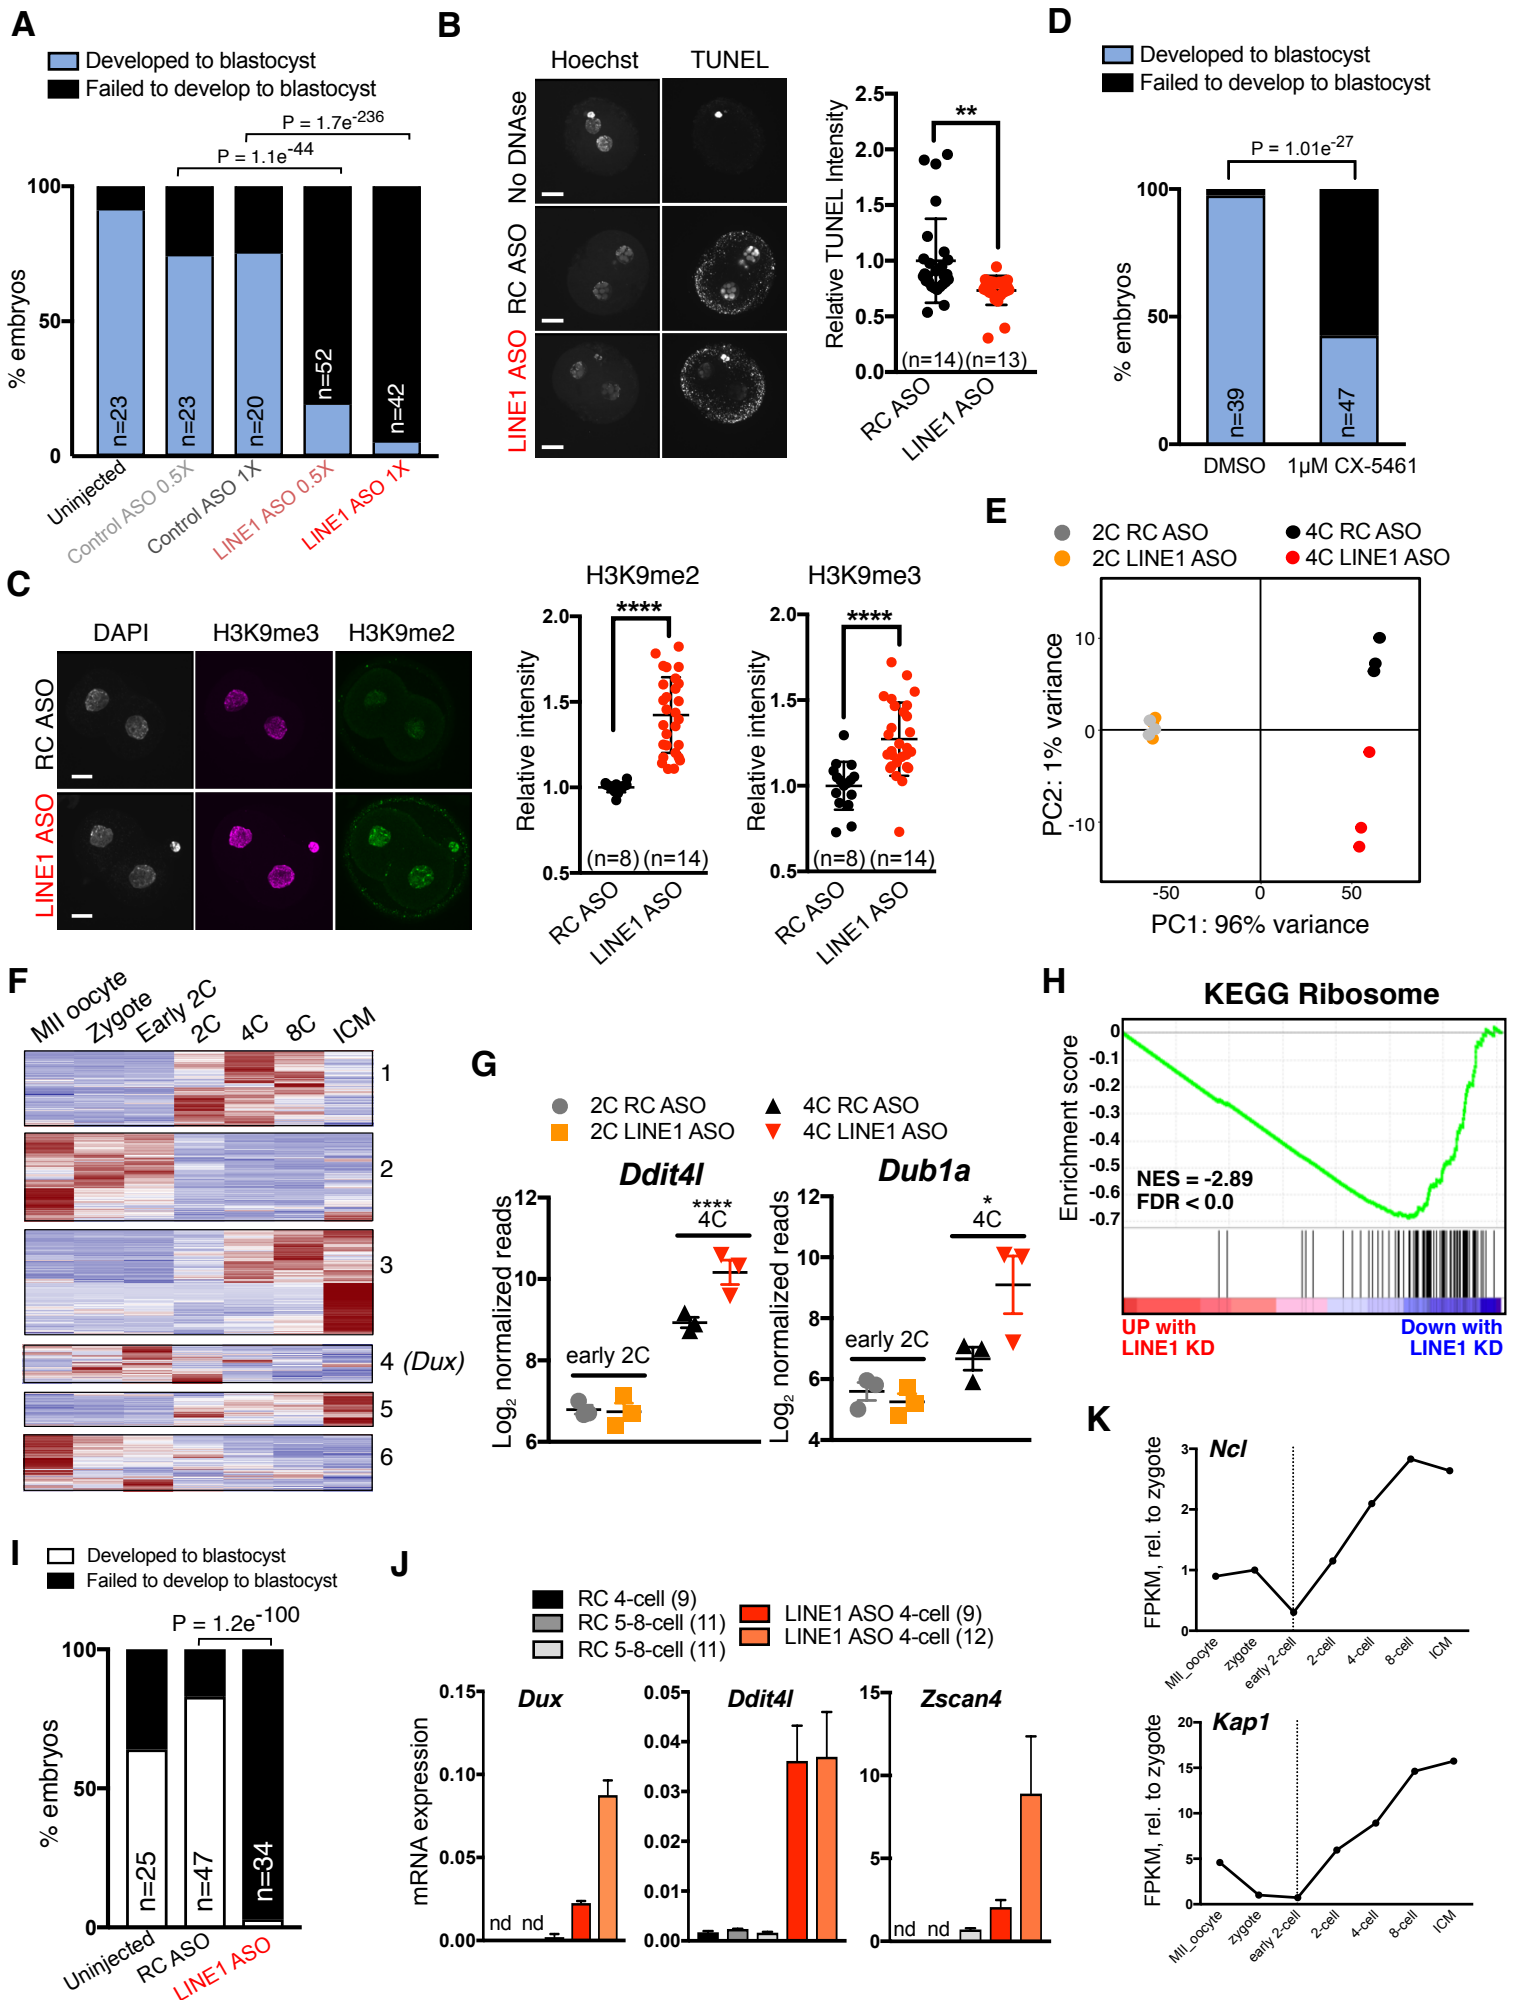

Supplement: NIHMS970221-supplement-12.pdf [file NIHMS970221-supplement-12.pdf]

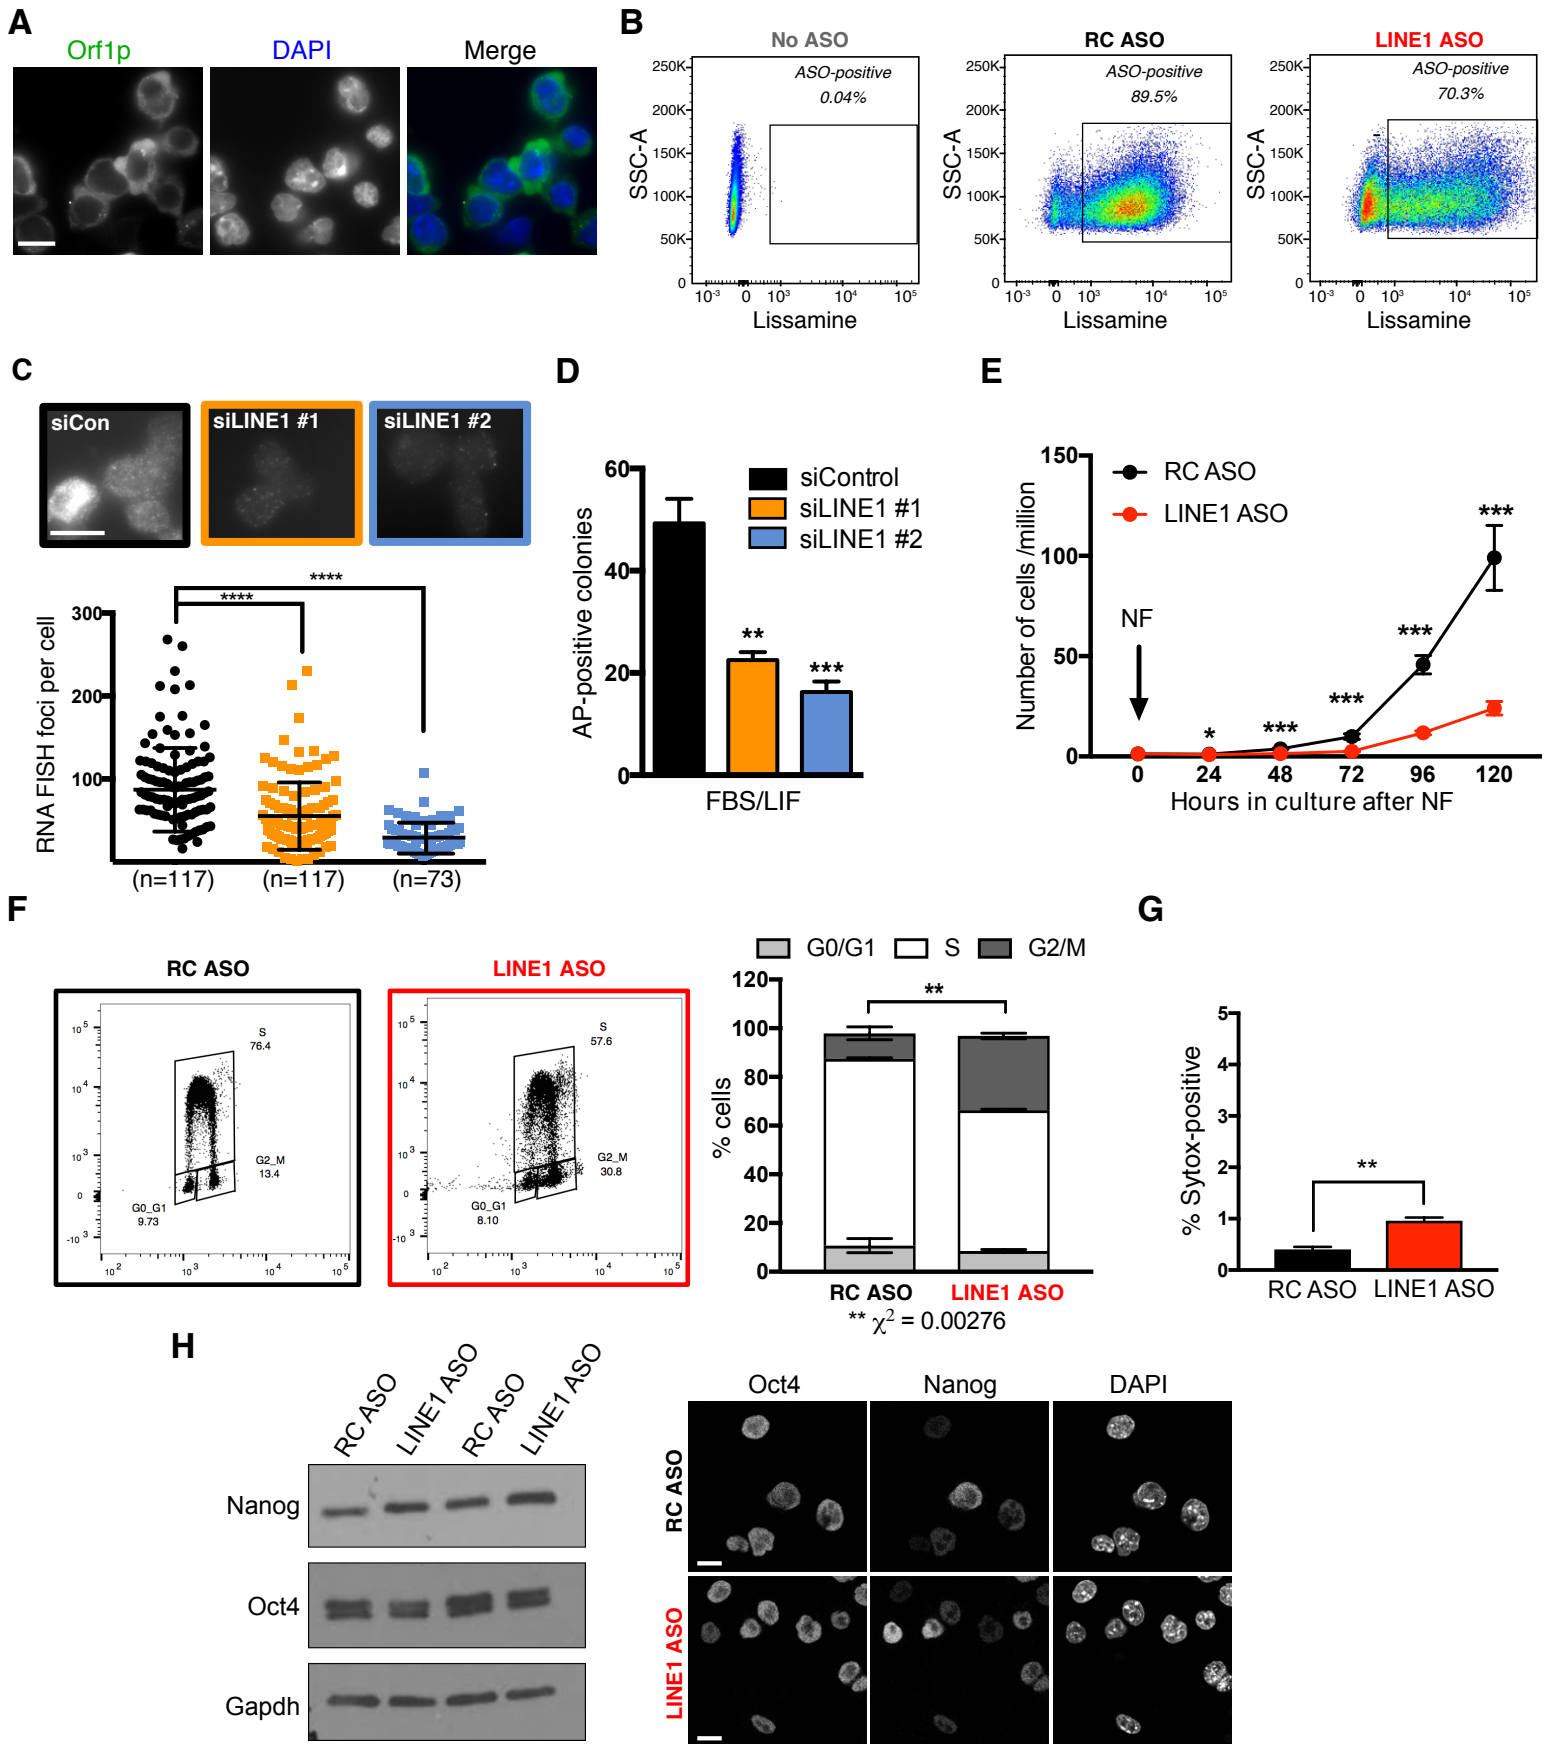

Percharde et al. Figure S1

Supplement: NIHMS970221-supplement-6.pdf [file NIHMS970221-supplement-6.pdf]

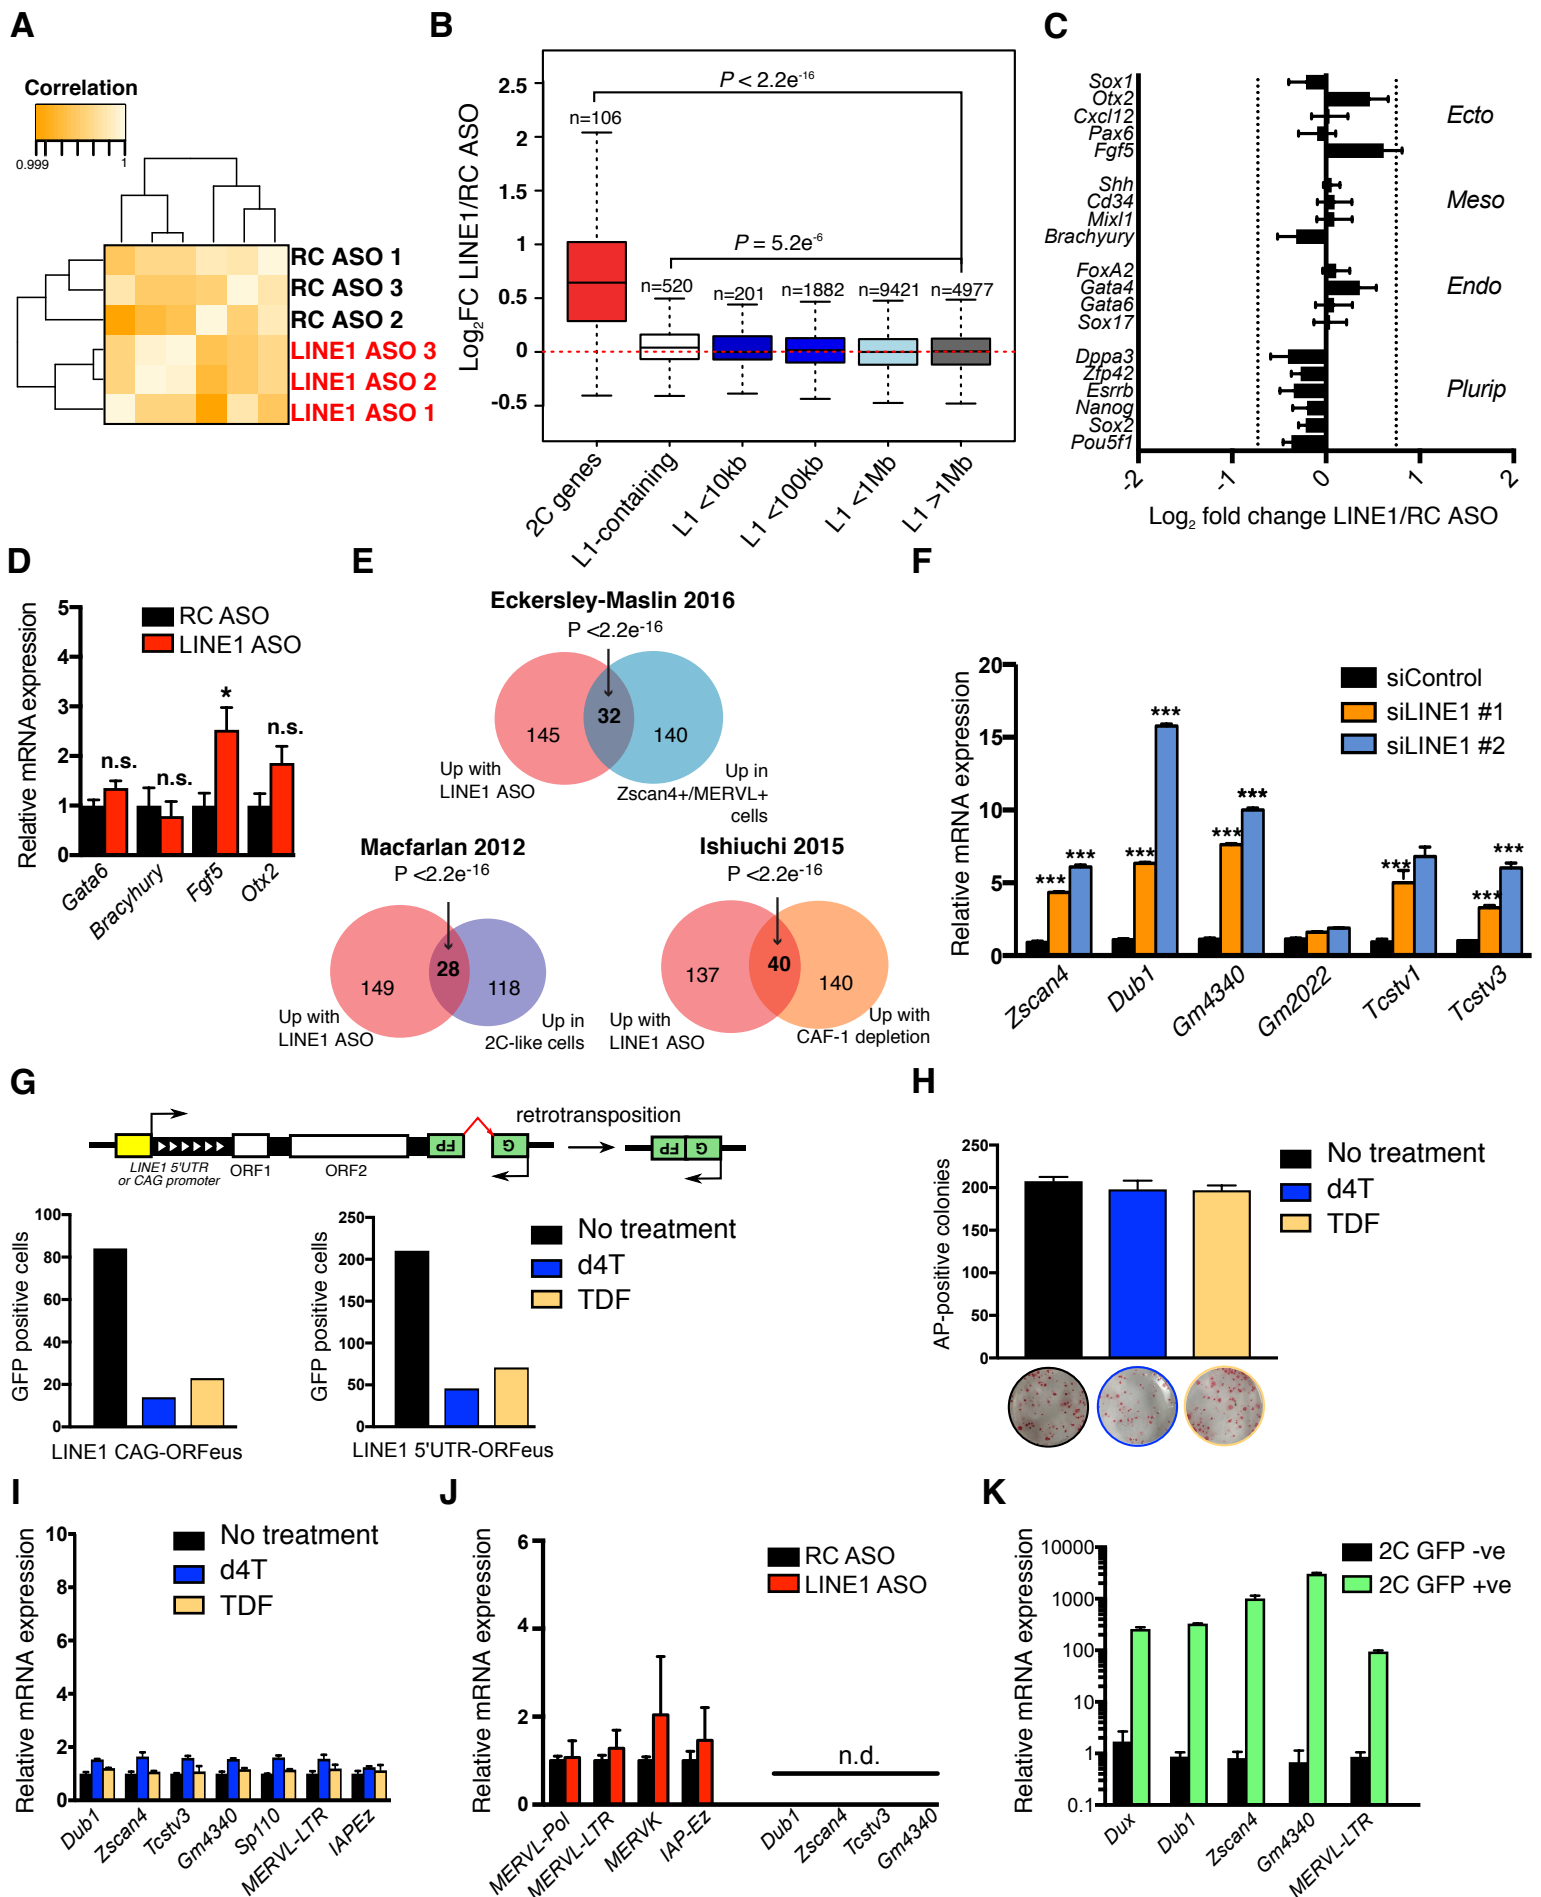

Supplement: NIHMS970221-supplement-7.pdf [file NIHMS970221-supplement-7.pdf]

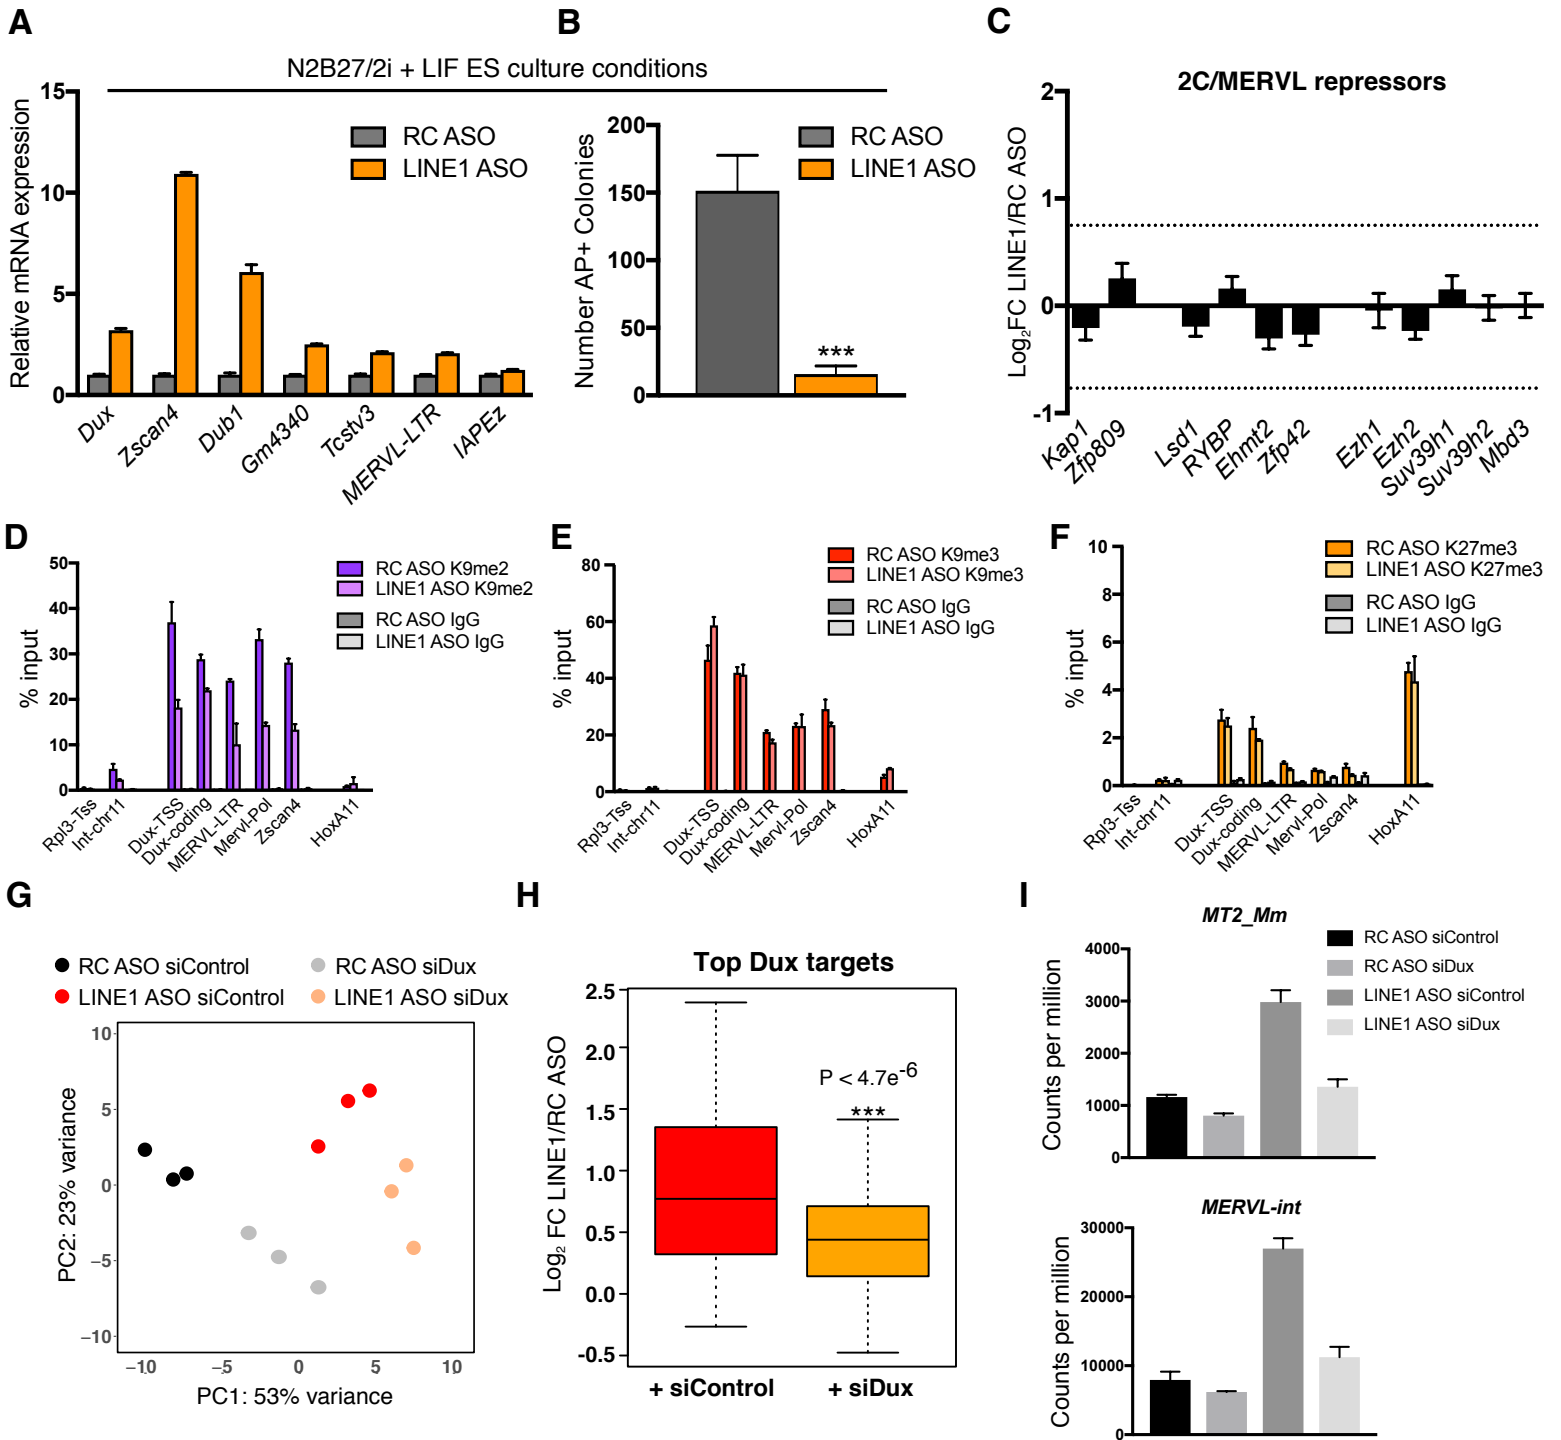

Percharde et al. Figure S3

Supplement: NIHMS970221-supplement-8.pdf [file NIHMS970221-supplement-8.pdf]

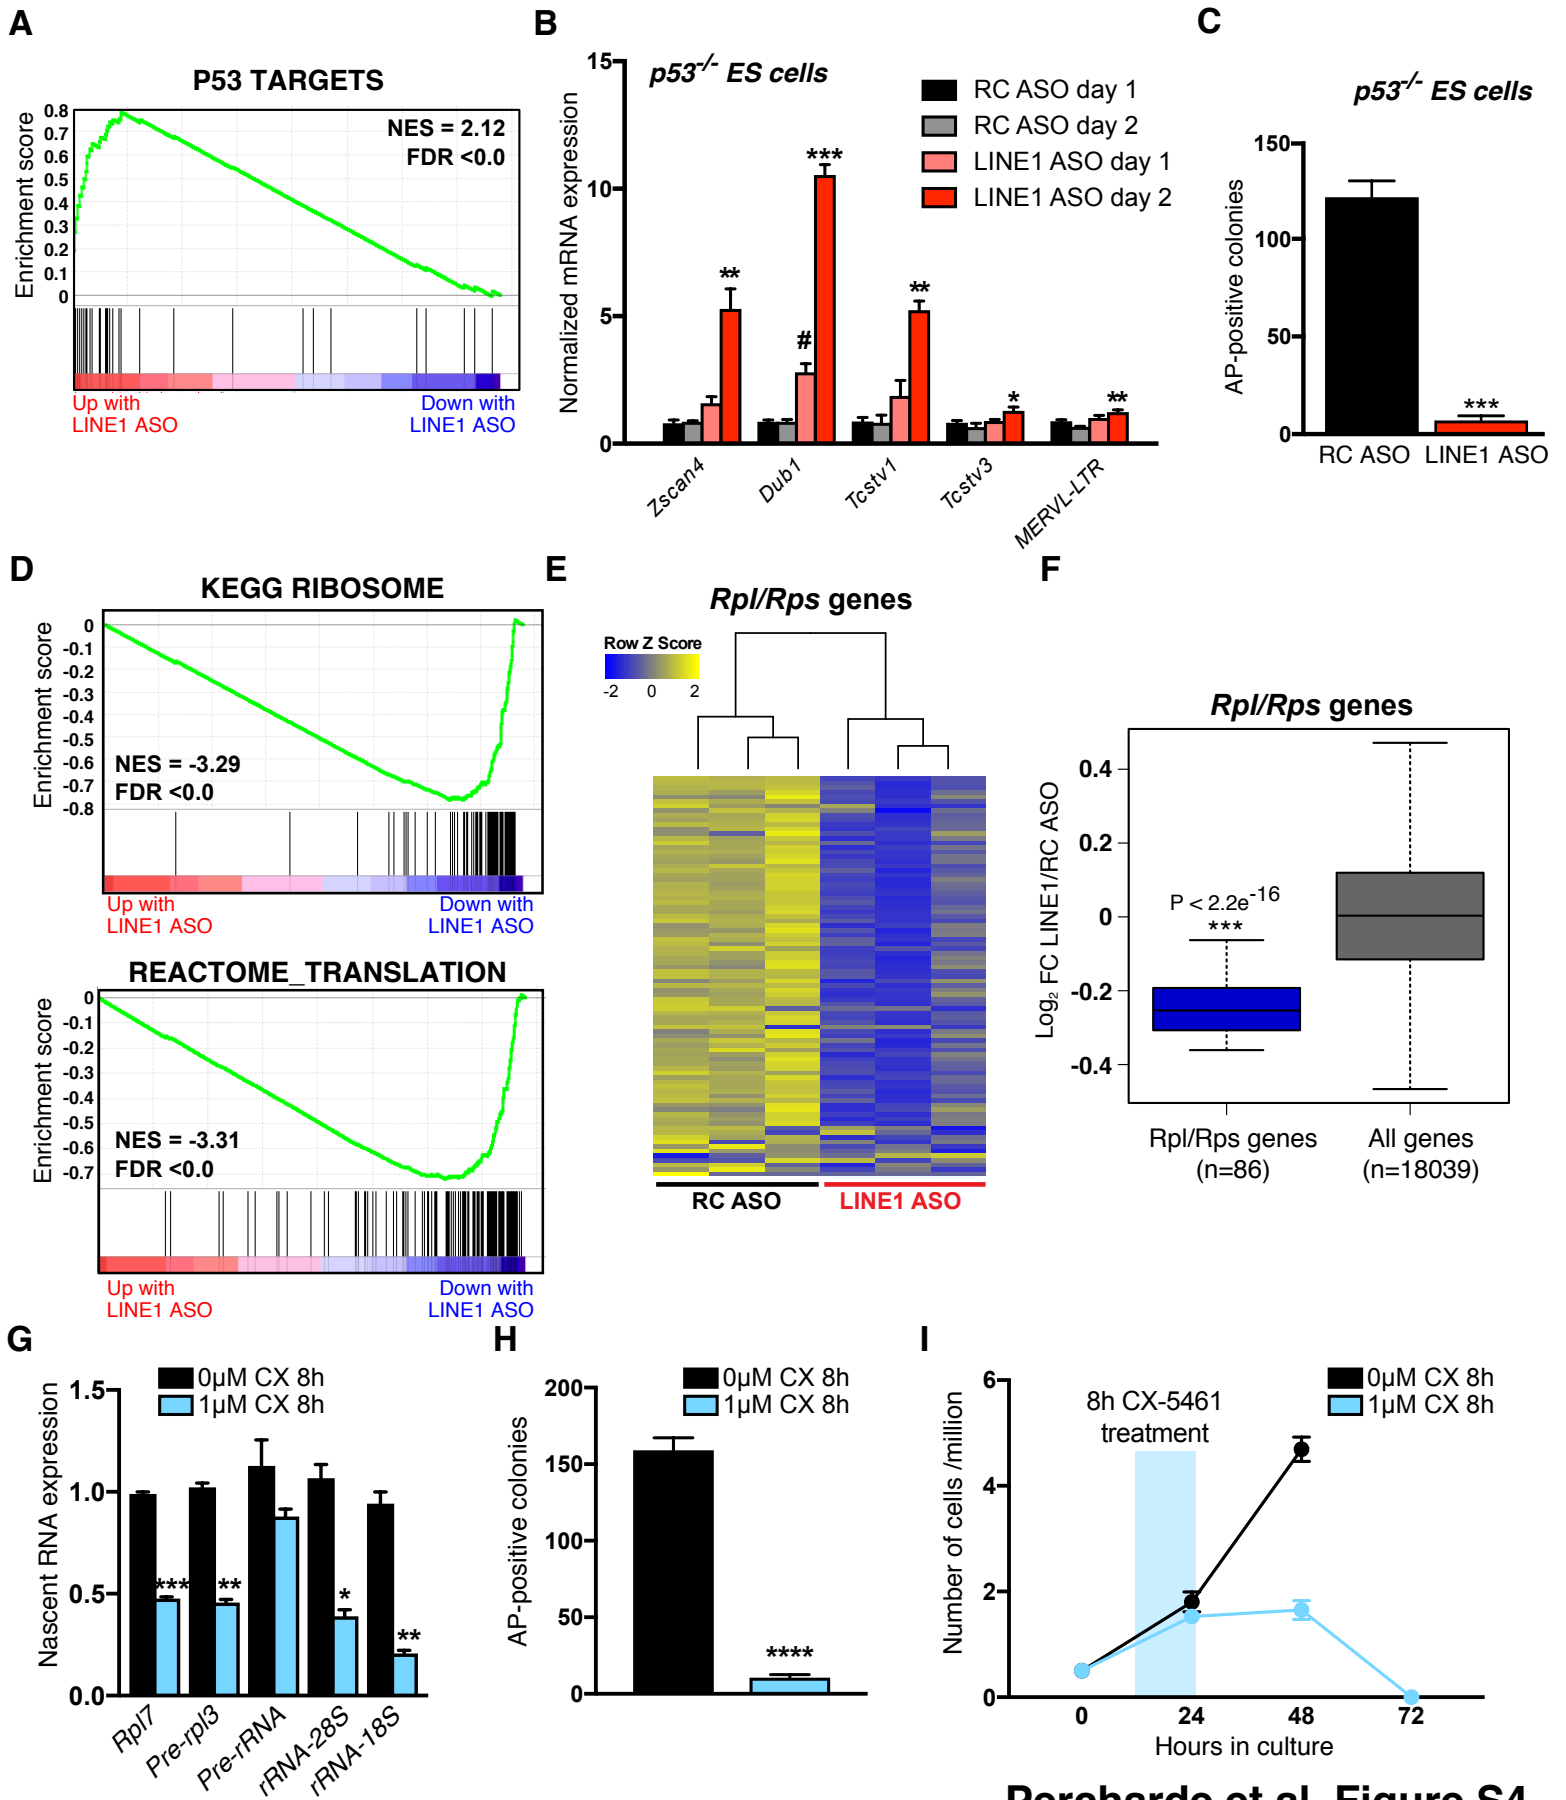

Percharde et al. Figure S4

Supplement: NIHMS970221-supplement-9.pdf [file NIHMS970221-supplement-9.pdf]
